# Supplementary material for: A general route to nanocrystal kebabs periodically assembled on stretched flexible polymer shish
Source: PubMed Central journal article supplement — Sci Adv. 2015 Mar 27;1(2):e1500025. doi: 10.1126/sciadv.1500025 (PMC4643824; doi:10.1126/sciadv.1500025), 2015-03-27
Supplement: 1500025_SM.pdf [file 1500025_SM.pdf]

## Supplementary Materials for A general route to nanocrystal kebabs periodically assembled on stretched flexible polymer shish

Hui Xu, Yuci Xu, Xinchang Pang, Yanjie He, Jaehan Jung, Haiping Xia, Zhiquan Lin

Published 27 March 2015, *Sci. Adv.* **1**, e1500025 (2015)

DOI: 10.1126/sciadv.1500025

### This PDF file includes:

- Fig. S1. Gel-like polypseudorotaxane  $\alpha$ -CD-PEG-Ts<sub>2</sub> inclusion complexes, in which  $\alpha$ -CDs are threaded by linear PEG-Ts<sub>2</sub>.
- Fig. S2. <sup>1</sup>H NMR spectrum of polyrotaxane  $\alpha$ -CD-PEG-MA<sub>2</sub> in DMSO-*d*<sub>6</sub>.
- Fig. S3. <sup>1</sup>H NMR spectrum of polyrotaxane macroinitiator 18Br- $\alpha$ -CD-PEG-MA<sub>2</sub> in CDCl<sub>3</sub>.
- Fig. S4. <sup>1</sup>H NMR spectrum of worm-like PtBA (sample 1 in Table 1) in CDCl<sub>3</sub>.
- Fig. S5. <sup>1</sup>H NMR spectrum of worm-like PtBA-*b*-PS (sample 1 in Table 1) in CDCl<sub>3</sub>.
- Fig. S6. <sup>1</sup>H NMR spectrum of worm-like PAA-*b*-PS (sample 1 in Table 1) in DMF-*d*<sub>7</sub>.
- Fig. S7. GPC traces of worm-like PtBA (blue) and PtBA-*b*-PS (red) (sample 1 in Table 1).
- Fig. S8. XRD pattern of semiconductor CdSe nanonecklaces.
- Fig. S9. XRD pattern of magnetic Fe<sub>3</sub>O<sub>4</sub> nanonecklaces.
- Fig. S10. XRD pattern of ferroelectric BaTiO<sub>3</sub> nanonecklaces.
- Fig. S11. EDS spectrum of semiconductor CdSe nanonecklaces.
- Fig. S12. EDS spectrum of magnetic Fe<sub>3</sub>O<sub>4</sub> nanonecklaces.
- Fig. S13. EDS spectrum of ferroelectric BaTiO<sub>3</sub> nanonecklaces.
- Fig. S14. Graphic illustration of the initial condition for  $q_A(\mathbf{r}, 0)$ .
- Fig. S15. Spherical micelles of 18-arm star-like diblock copolymer in the mixed solvents of DMF/BA.
- Fig. S16. The calculated density profiles of A block (inner PAA) and B block (outer PS) in star-like diblock copolymers.
- Fig. S17. (a) TEM image of a number of CdSe nanonecklaces obtained by drop-casting a high-concentration CdSe nanonecklace DMF solution on the TEM grid. (b) The corresponding histogram of the length distribution of CdSe nanonecklaces shown in (a).
- Fig. S18. An ultralong CdSe nanonecklace.

Table S1. Calculated dimensions of elongated ellipsoid-shaped PAA-*b*-PS diblock copolymers on the PEG chain.

Scheme S1. Chain-extension reaction for the formation of chain-extended linear PEG.

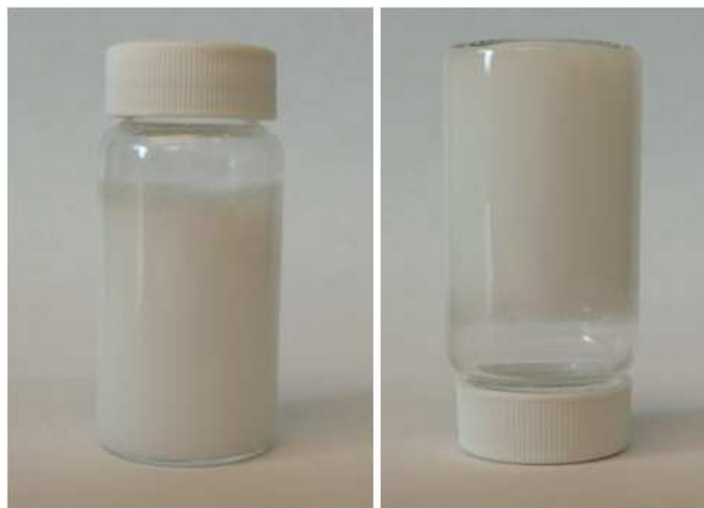

**Fig. S1.** Gel-like polypseudorotaxane  $\alpha$ -CD-PEG-Ts<sub>2</sub> inclusion complexes, in which  $\alpha$ -CDs are threaded by linear PEG-Ts<sub>2</sub>.

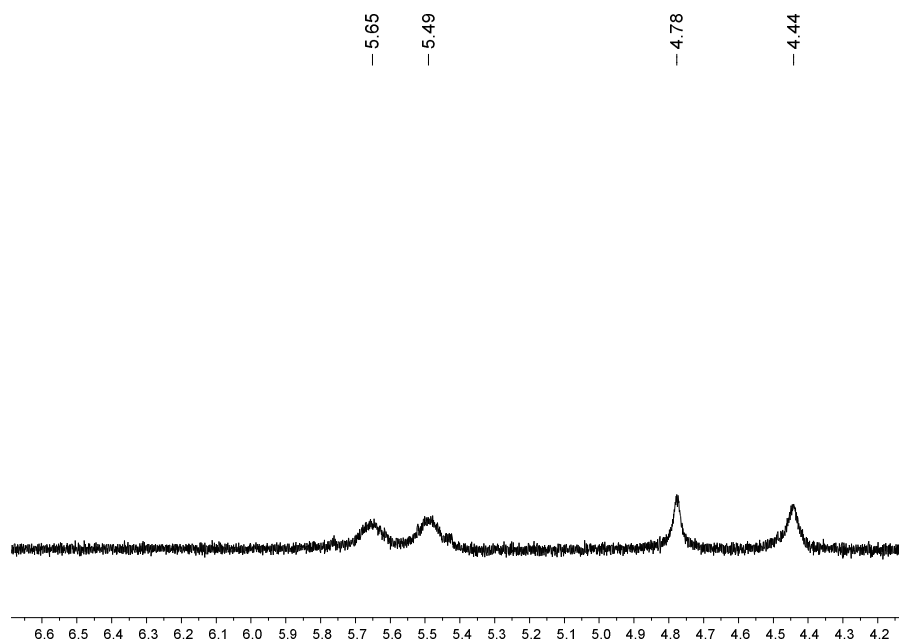

**Fig. S2.** <sup>1</sup>H NMR spectrum of polyrotaxane  $\alpha$ -CD-PEG-MA<sub>2</sub> in DMSO-*d*<sub>6</sub>.

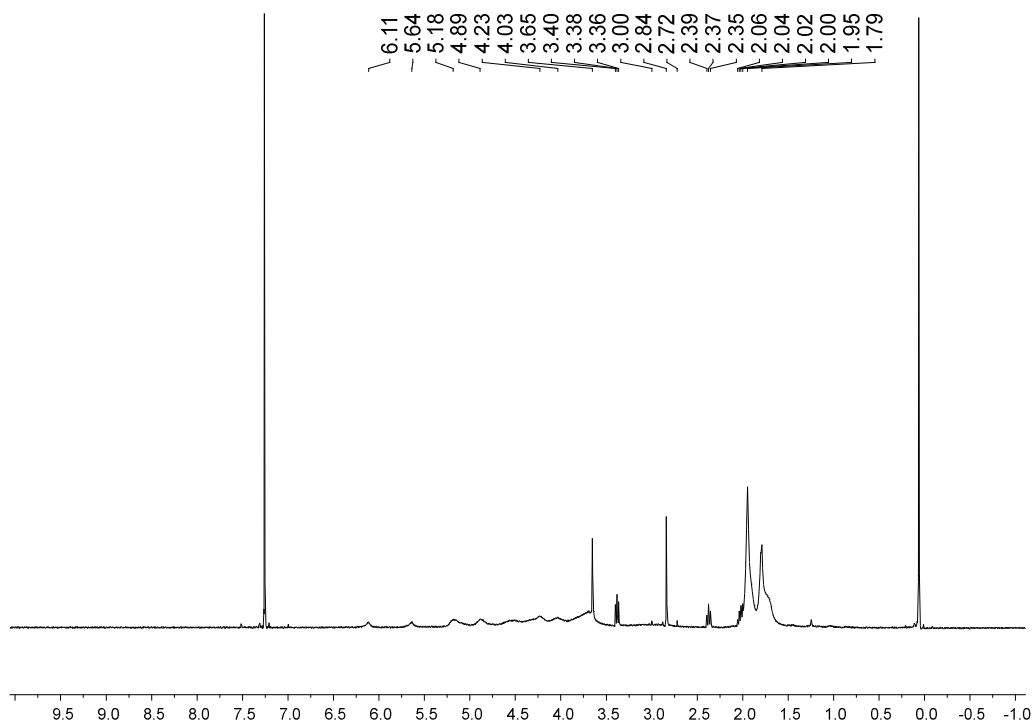

**Fig. S3.**  $^1\text{H}$  NMR spectrum of polyrotaxane macroinitiator 18Br- $\alpha$ -CD-PEG-MA<sub>2</sub> in CDCl<sub>3</sub>.

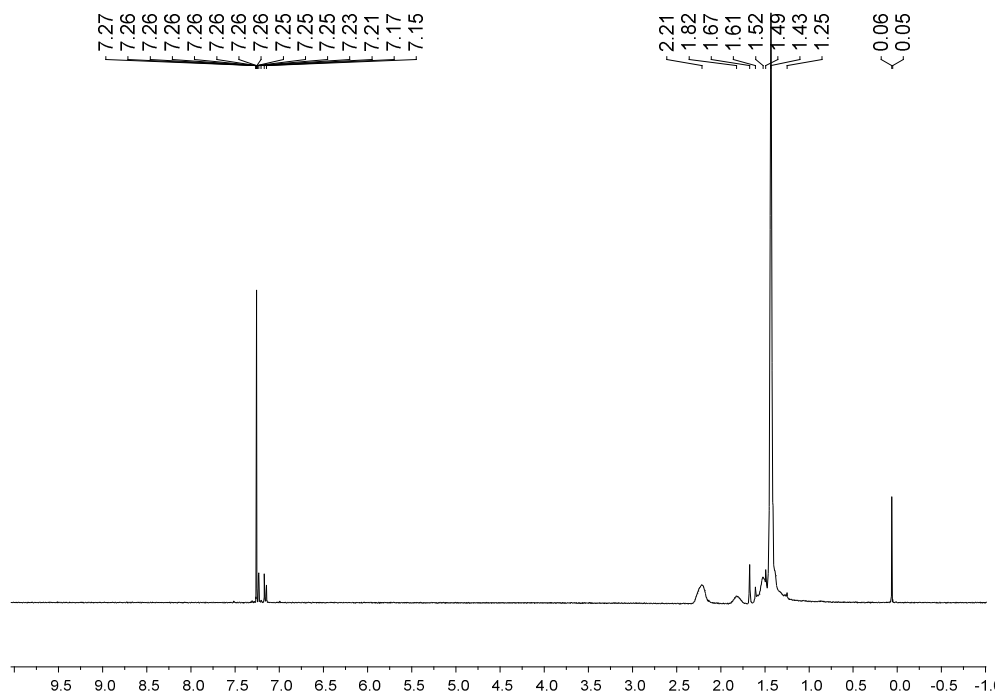

**Fig. S4.**  $^1\text{H}$  NMR spectrum of worm-like PtBA (sample 1 in Table 1) in CDCl<sub>3</sub>.

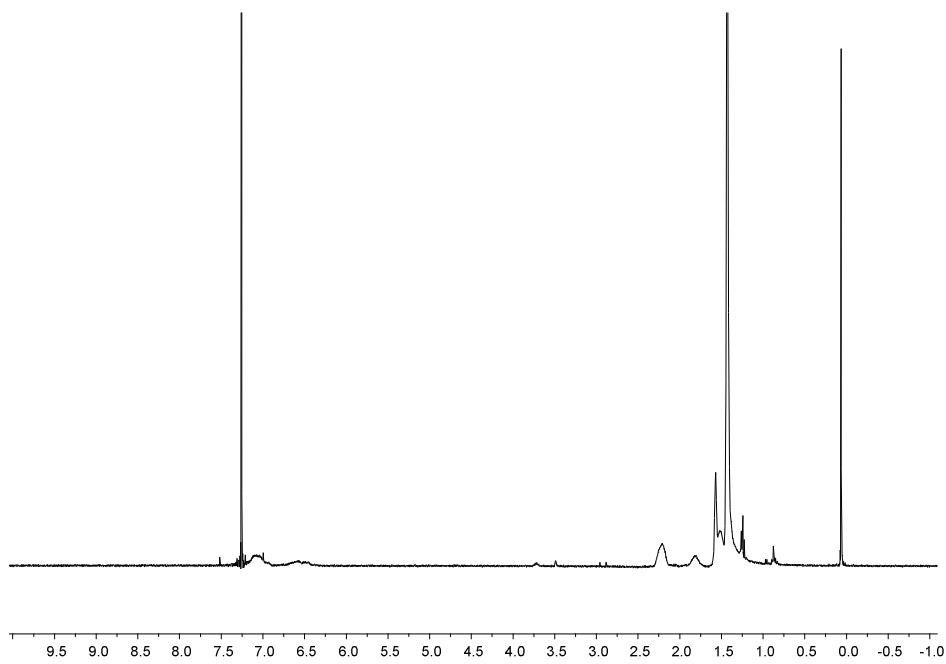

**Fig. S5.** <sup>1</sup>H NMR spectrum of worm-like PtBA-*b*-PS (sample 1 in Table 1) in CDCl<sub>3</sub>.

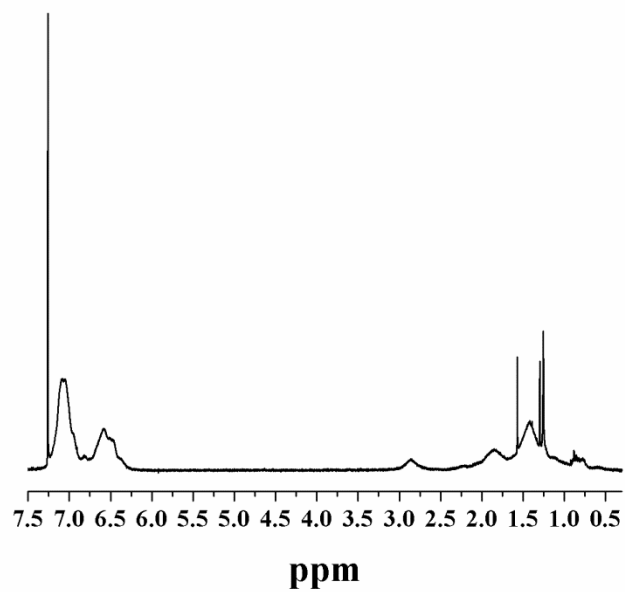

**Fig. S6.** <sup>1</sup>H NMR spectrum of worm-like PAA-*b*-PS (sample 1 in Table 1) in DMF-*d*<sub>7</sub>.

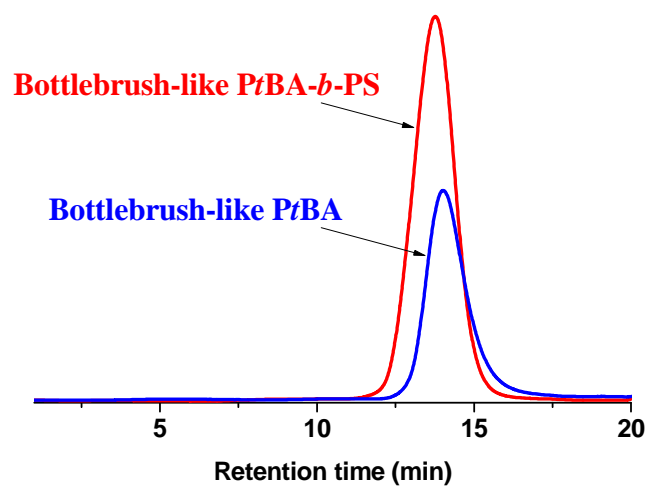

**Fig. S7.** GPC traces of worm-like PtBA (blue) and PtBA-*b*-PS (red) (sample 1 in Table 1).

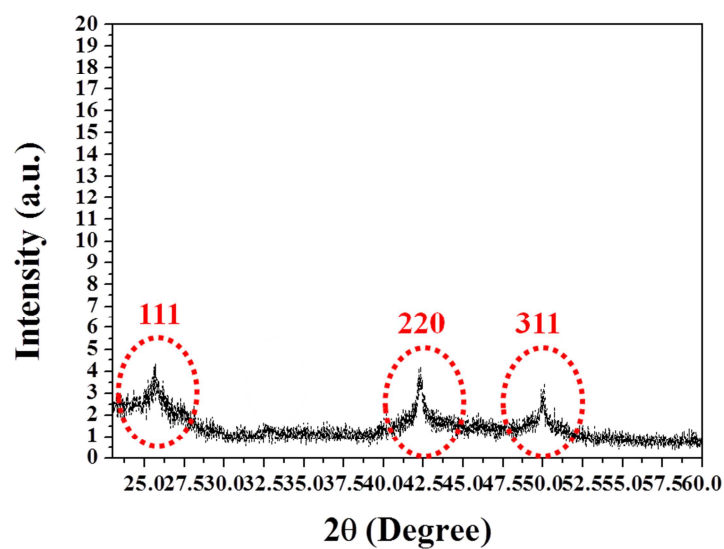

**Fig. S8.** XRD pattern of semiconductor CdSe nanonecklaces.

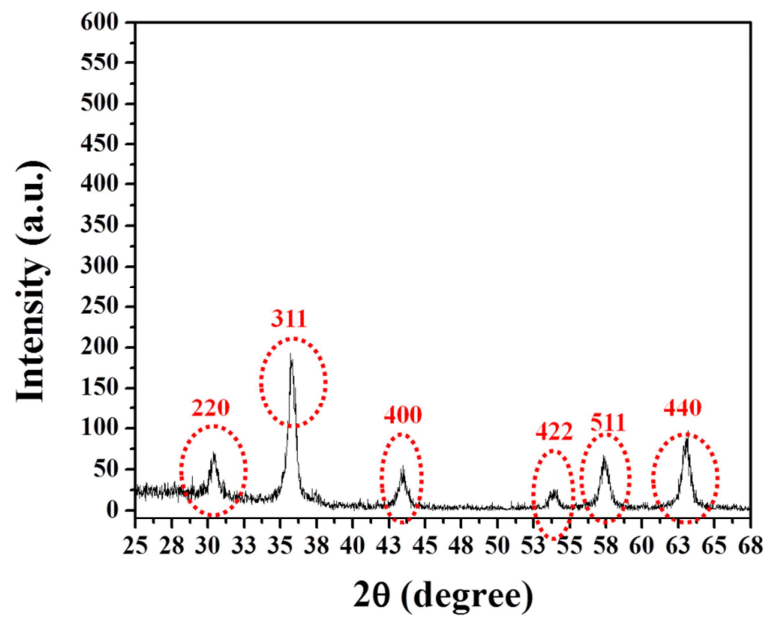

**Fig. S9.** XRD pattern of magnetic Fe<sub>3</sub>O<sub>4</sub> nanonecklaces.

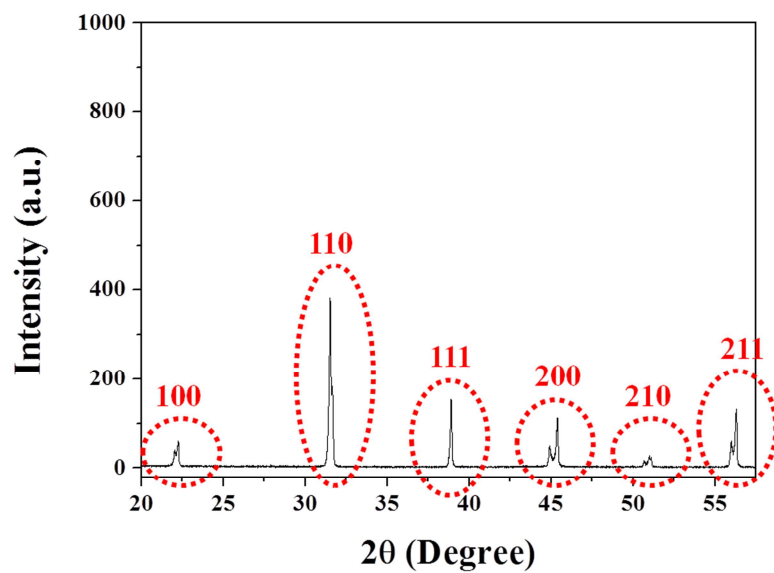

**Fig. S10.** XRD pattern of ferroelectric BaTiO<sub>3</sub> nanonecklaces.

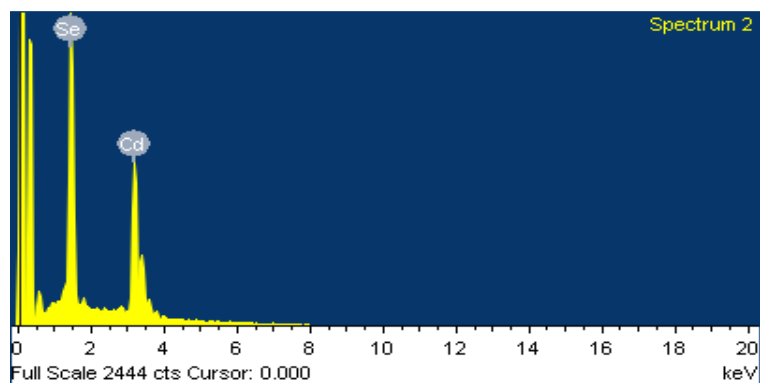

| Element | Weight% | Atomic% |
|---------|---------|---------|
| Se L    | 45.28   | 54.08   |
| Cd L    | 54.72   | 45.92   |
| Totals  | 100.00  | 100.00  |

**Fig. S11.** EDS spectrum of semiconductor CdSe nanonecklaces.

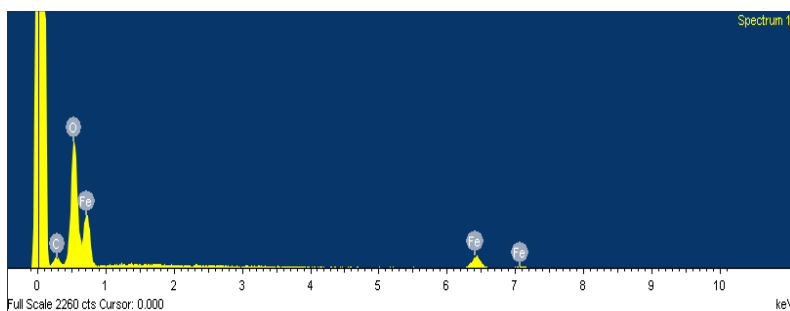

| Element | Weight% | Atomic% |
|---------|---------|---------|
| C K     | 3.88    | 9.41    |
| O K     | 31.15   | 56.71   |
| Fe L    | 64.97   | 33.88   |
| Totals  | 100.00  | 100.00  |

**Fig. S12.** EDS spectrum of magnetic Fe<sub>3</sub>O<sub>4</sub> nanonecklaces.



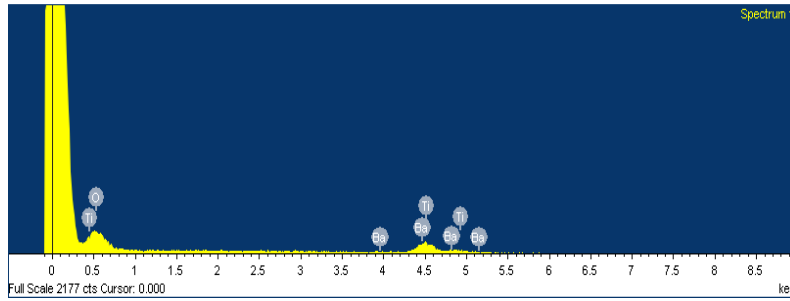

| Element | Weight% | Atomic% |
|---------|---------|---------|
| O K     | 30.68   | 69.14   |
| Ti K    | 25.82   | 15.44   |
| Ba L    | 43.50   | 15.42   |
| Totals  | 100.00  | 100.00  |

**Fig. S13.** EDS spectrum of ferroelectric BaTiO<sub>3</sub> nanonecklaces.

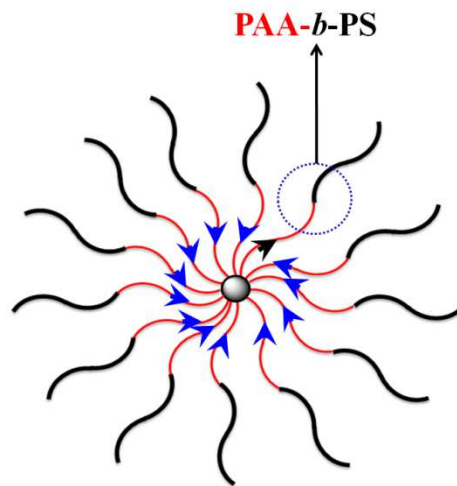

**Fig. S14.** Graphic illustration of the initial condition for  $q_A(\mathbf{r}, 0)$ . The blue arrows indicate the propagation of  $q^\dagger(\mathbf{r}, s)$ , and the black arrow indicates the propagation of  $q(\mathbf{r}, s)$ .

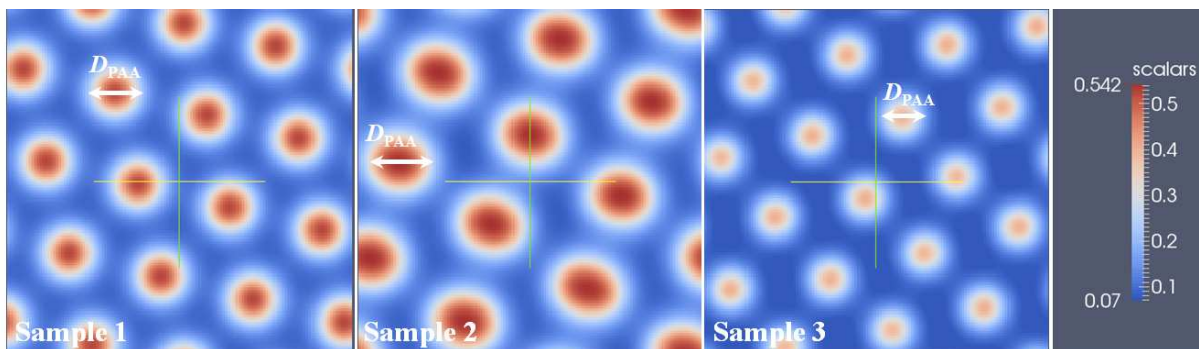

**Fig. S15.** Spherical micelles of 18-arm star-like diblock copolymer in the mixed solvents of DMF/BA (i.e., without being threaded in a PEG chain). The box size is  $3R_g$ , where  $R_g$  is the radius of gyration of linear diblock copolymer with degree of polymerization  $N$ . The parameters chosen in simulations are  $\chi_{AB}N = 350$ ,  $\chi_{AS}N = 290$ ,  $\chi_{BS}N = 320$ , and polymer concentration  $\phi = 0.35$ .

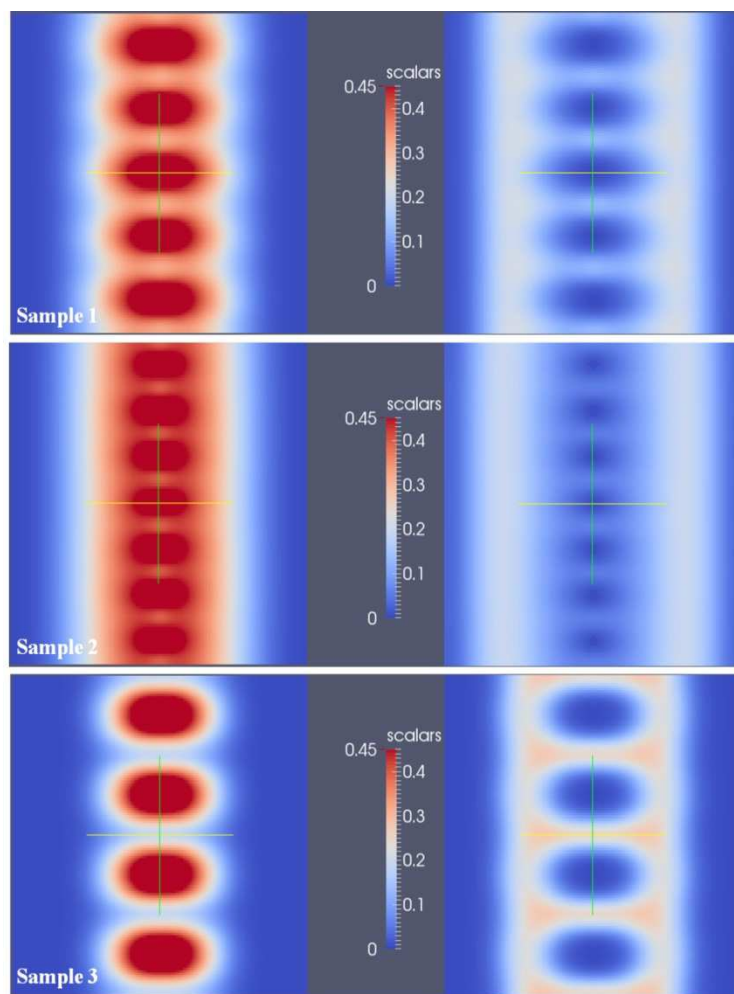

**Fig. S16.** The calculated density profiles of A block (inner PAA) and B block (outer PS) in star-like diblock copolymers.

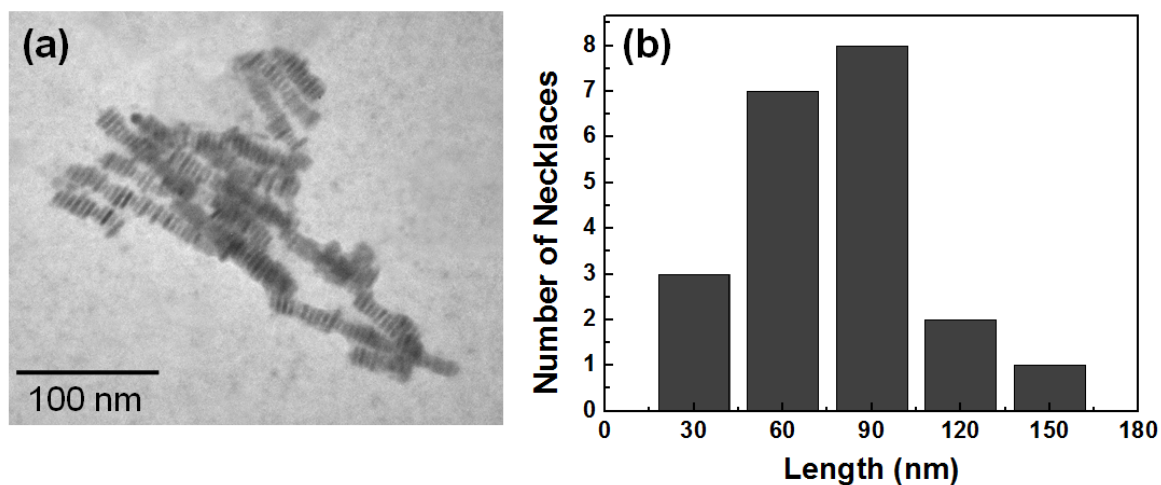

**Figure S17.** (a) TEM image of a number of CdSe nanonecklaces obtained by drop-casting a high-concentration CdSe nanonecklace DMF solution on the TEM grid. (b) The corresponding histogram of the length distribution of CdSe nanonecklaces shown in (a).

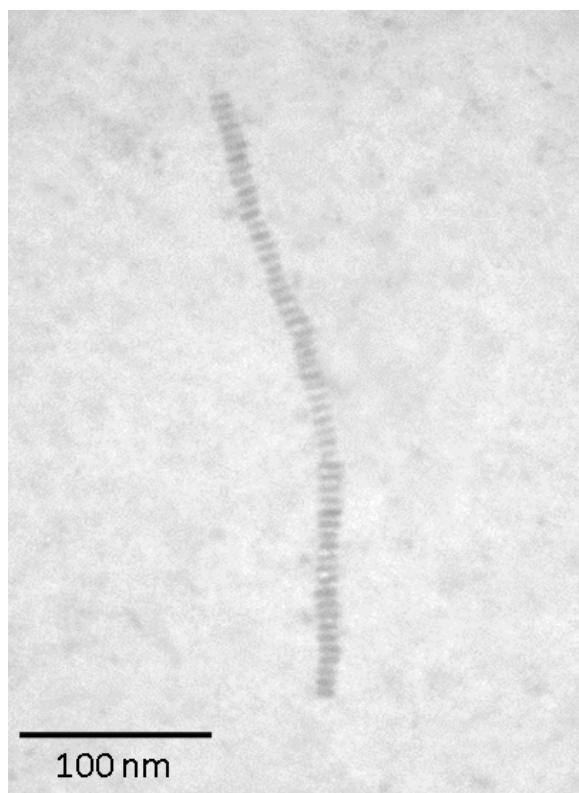

**Figure S18.** An ultralong CdSe nanonecklace.

**Table S1.** Calculated dimensions of elongated ellipsoid-shaped PAA-*b*-PS diblock copolymers on the PEG chain.

| Samples  | $D(\text{nm})^*$ | $t(\text{nm})^*$ | $s(\text{nm})^*$ | $Nu^*$ |
|----------|------------------|------------------|------------------|--------|
| Sample 1 | 10.7±0.8         | 4.2±0.1          | 1.9±0.2          | 5      |
| Sample 2 | 11.5±0.5         | 3.0±0.1          | 1.4±0.1          | 7      |
| Sample 3 | 8.5±0.1          | 5.1±0.1          | 2.4±0.1          | 4      |

\*The  $D$ ,  $t$ ,  $s$ , and the number of nanodisks ( $Nu$ ) per PEG chain were determined by self-consistent filed theory.

### Formation of chain-extended PEG by chain-extension reaction

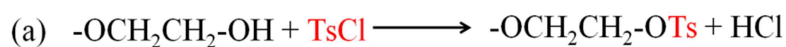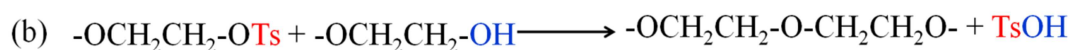

**Scheme S1.** Chain-extension reaction for the formation of chain-extended linear PEG.
